# Supplementary material for: Put MY mask on first: Mothers’ reactions to prioritizing health behaviours as a function of self-compassion and fear of self-compassion
Source: PubMed Central journal article supplement (PMC8978476; doi:10.1177/1359105321995979), 2021-02-18
Supplement: sj-pdf-1-hpq-10.1177_1359105321995979.pdf [file sj-pdf-1-hpq-10.1177_1359105321995979.pdf]

Supplemental Table 1

*Participant Demographics (n = 111)*

| Variable            |                           | <i>N</i> | %    |
|---------------------|---------------------------|----------|------|
| Age                 | 19 – 30                   | 47       | 42.3 |
|                     | 31 – 40                   | 51       | 45.9 |
|                     | 41 – 50                   | 12       | 10.8 |
|                     | 51 – 60                   | 1        | 0.9  |
|                     | <hr/>                     |          |      |
| Cultural Background | Caucasian                 | 82       | 73.9 |
|                     | Indigenous                | 0        | 0    |
|                     | Hispanic                  | 5        | 4.5  |
|                     | African American          | 2        | 1.8  |
|                     | Asian                     | 7        | 6.3  |
|                     | Other                     | 15       | 13.5 |
|                     | <hr/>                     |          |      |
| Education Completed | High School               | 16       | 14.4 |
|                     | College/Vocational School | 26       | 23.4 |
|                     | University                | 52       | 46.8 |
|                     | Postgraduate              | 17       | 15.3 |
|                     | <hr/>                     |          |      |
| Employment Status   | Stay at home mother       | 23       | 20.7 |
|                     | Student                   | 3        | 2.7  |
|                     | Part-time                 | 20       | 18.0 |
|                     | Full-time                 | 65       | 58.5 |
|                     | <hr/>                     |          |      |
| Marital Status      | Single                    | 14       | 12.6 |
|                     | Common-law                | 16       | 14.4 |
|                     | Married                   | 78       | 70.2 |
|                     | Separated/Divorced        | 3        | 2.7  |
|                     | <hr/>                     |          |      |
| Number of Children  | 1                         | 41       | 36.9 |
|                     | 2                         | 57       | 51.3 |
|                     | 3                         | 7        | 6.3  |
|                     | 4                         | 3        | 2.7  |
|                     | 5+                        | 3        | 2.7  |
|                     | <hr/>                     |          |      |

Supplemental Table 2

*Descriptive Statistics*

| Variable                           | Range       | M     | SD   | Alpha |
|------------------------------------|-------------|-------|------|-------|
| Self-Compassion                    | 1.35 – 4.50 | 2.84  | 0.65 | 0.92  |
| Fear of Self-<br>Compassion        | 0 – 3.40    | 1.44  | 0.82 | 0.92  |
| Confident vs<br>Insecure           | -3 – 3      | -0.71 | 1.65 | N/A   |
| Lazy vs Industrious                | -2 – 3      | 1.01  | 1.41 | N/A   |
| A Success vs A<br>Failure          | -3 – 3      | -1.02 | 1.56 | N/A   |
| Anxious vs<br>Relaxed              | -3 – 3      | -0.04 | 1.76 | N/A   |
| Unhappy vs Happy                   | -3 – 3      | 1.17  | 1.41 | N/A   |
| Responsible vs<br>Irresponsible    | -3 – 3      | 1.45  | 1.62 | N/A   |
| Self-centered vs<br>Other-oriented | -3 – 3      | 0.16  | 1.39 | N/A   |
| Pleasant vs<br>Unpleasant          | -3 – 2      | -1.46 | 1.23 | N/A   |
| Arrogant vs<br>Modest              | -2 – 3      | 0.96  | 1.29 | N/A   |
| Careful vs Careless                | -3 – 2      | -1.58 | 1.26 | N/A   |

|                   |        |       |      |     |
|-------------------|--------|-------|------|-----|
| Judgmental vs     | -3 – 3 | -0.03 | 1.34 | N/A |
| Non-judgmental    |        |       |      |     |
| Competent vs      | -3 – 2 | -1.47 | 1.16 | N/A |
| Incompetent       |        |       |      |     |
| Weak vs Strong    | -2 – 3 | 1.04  | 1.38 | N/A |
| Admirable vs      | -3 – 3 | -0.98 | 1.24 | N/A |
| Shameful          |        |       |      |     |
| Ambitious vs Non  | -3 – 2 | -1.14 | 1.28 | N/A |
| ambitious         |        |       |      |     |
| Competitive vs    | -3 – 3 | 0.19  | 1.55 | N/A |
| Cooperative       |        |       |      |     |
| Self-indulgent vs | -3 – 2 | -0.65 | 1.17 | N/A |
| Self-denying      |        |       |      |     |
